# Supplementary material for: In situ confinement of ultrahigh-density Co2P nanoparticles within biomass-derived carbon nanosheet frameworks as efficient cocatalysts for solar H2 production
Source: Royal Society of Chemistry journal article supplement (doi:10.1039/d5ya00112a), 2025-01-01
Supplement: d5ya00112a1.pdf [file d5ya00112a1.pdf]

## Electronic Supplementary Information for

### ***In situ* confinement of ultrahigh-density Co<sub>2</sub>P nanoparticles within biomass-derived carbon nanosheet frameworks as efficient cocatalysts for solar H<sub>2</sub> production**

Fang Wang,<sup>a,b</sup> Junqing Wang,<sup>a,b</sup> Jiao Zhang,<sup>c</sup> Yiming Li,<sup>c</sup> Zhengguo Zhang<sup>a,b</sup> and

Shixiong Min<sup>\*a,b,c</sup>

<sup>a</sup> *School of Chemistry and Chemical Engineering, North Minzu University, Yinchuan, 750021, P. R. China.*

<sup>b</sup> *Ningxia Key Laboratory of Solar Chemical Conversion Technology, North Minzu University, Yinchuan, 750021, P. R. China.*

<sup>c</sup> *Analysis and Testing Center of Ningxia Hui Autonomous Region, North Minzu University, Yinchuan, 750021, P. R. China.*

\*Corresponding authors: [sxmin@nwnu.edu.cn](mailto:sxmin@nwnu.edu.cn)

## 1. Experimental section

### 1.1 Chemicals and materials

All reagents used in this work were analytically pure and without further purification. The cobalt nitrate hexahydrate ( $\text{Co}(\text{NO}_3)_2 \cdot 6\text{H}_2\text{O}$ , 99%) was purchased from Shanghai Titan Science. Sodium hypophosphite ( $\text{NaH}_2\text{PO}_2 \cdot 2\text{H}_2\text{O}$ , 99%) purchased from Shanghai Macklin Biochemical Co., Ltd. Triethanolamine (TEOA) was purchased from Xilong Scientific (>99.8%). Erythrosine B (ErB), Eosin Y (EY), and Fluorescein Sodium (NaFL) were purchased from Tianjin Guangfu Fine Chemical Research Institute. Rose Bengal (RB) was obtained from Shanghai Zhongqin Chemical Reagent Co., Ltd. Rhodamine B (RhB) was purchased from Beijing Chemical Factory. The *Pleurotus eryngii* (PE) was purchased from a local vegetable market of Yinchuan, China. Natural basswood was purchased from Ruiyi Wood Industry Company (China). All solutions were prepared with ultrapure water ( $18.2 \text{ M}\Omega \text{ cm}$ ).

### 1.2 Materials preparation

#### 1.2.1 Co/CPE

Raw *Pleurotus eryngii* (PE) was first cut into slice according to the growth direction, washed, and freezing-dried. Then the dry PE slices were soaked in a  $\text{Co}(\text{NO}_3)_2$  solution (0.05-0.4 M) for 2 h to obtain  $\text{Co}^{2+}$ -adsorbed PE ( $\text{Co}^{2+}$ -PE) and freeze-dried overnight. Afterwards, the  $\text{Co}^{2+}$ -PE was successively carbonized in air at  $260^\circ\text{C}$  for 6 h and in an Ar atmosphere at  $1000^\circ\text{C}$  for 6 h to obtain Co/CPE.

#### 1.2.2 $\text{Co}_2\text{P}$ /CPE

500 mg of Co/CPE was mixed with 2 g of  $\text{NaH}_2\text{PO}_2 \cdot 2\text{H}_2\text{O}$  and thoroughly ground. The resulting mixture was then transferred into a tubular furnace and heated at  $300^\circ\text{C}$  for 2 h with a ramping rate of  $2.5^\circ\text{C min}^{-1}$  under Ar atmosphere. The obtained samples were washed with deionized water three times and dried in a vacuum oven overnight to

obtain Co<sub>2</sub>P/CPE.

#### *1.2.3 Co<sub>2</sub>P/CW*

The carbonized wood supported Co<sub>2</sub>P (Co<sub>2</sub>P/CW) catalyst was prepared by using the exact same procedure for Co<sub>2</sub>P/CPE except using natural wood powder instead of using PE.

#### *1.2.4 Co<sub>2</sub>P nanoparticles*

The Co<sub>2</sub>P nanoparticles were prepared by the direct phosphidation of Co(NO<sub>3</sub>)<sub>2</sub> using NaH<sub>2</sub>PO<sub>2</sub> following the procedures for the preparation of Co<sub>2</sub>P/CPE.

### **1.3 Characterization**

The phase structure of the samples was analyzed using a Rigaku Smartlab X-ray diffractometer (XRD) with Ni-filtered Cu K $\alpha$  radiation. The morphology of the samples was observed with a ZEISS EVO 10 scanning electron microscope (SEM). The microstructure of the samples was observed with a JEM 2100F transmission electron microscope (TEM). X-ray photoelectron spectroscopy (XPS, Thermo Scientific Escalab-250Xi, Al K $\alpha$  radiation) was analyzed to investigate the surface characteristics of the membrane electrodes. Inductively coupled plasma optical emission spectroscopy (ICP-OES) with an Agilent 5110 instrument was used to determine the Co and P contents in the samples. Photoluminescence (PL) spectra were determined by a Horiba Scientific FluoroMax-4 spectrofluorometer spectrometer. The excitation wavelengths for ErB sensitized systems and CdS-based systems are 480 and 370 nm, respectively.

### **1.4 Photocatalytic H<sub>2</sub> evolution experiments**

#### *1.4.1 Dye-sensitized photocatalytic H<sub>2</sub> evolution experiments*

Photocatalytic H<sub>2</sub> evolution experiments were performed in a sealed Pyrex reactor (315 mL) with a top flat quartz window (38.47 cm<sup>2</sup>) for light irradiation and a silicone rubber septum was fixed on its side for sampling the produced H<sub>2</sub>. In a typical

procedure, ErB and Co<sub>2</sub>P/CPE were added to the reaction cell containing 100 mL of 10 vol.% TEOA (pH 8) aqueous solution under vigorous stirring. Then, the reaction solution was thoroughly degassed by repeated evacuation-N<sub>2</sub> filling, and finally refilled with N<sub>2</sub> to reach ambient pressure. After that, the reaction solution was irradiated by a 30 W white-light LED lamp with a 420 nm cut-off filter. During the reaction, the mixture solution was continuously stirred. The amount of H<sub>2</sub> produced was manually taken out by a gas-tight syringe (Agilent, 1.0 mL) and analyzed at given time intervals with a gas chromatography (Tech comp; GC-7900) with a thermal conductivity detector, a 5 Å molecular sieve column, and with N<sub>2</sub> as carrying gas. For evaluating the stability of the Co<sub>2</sub>P/CPE, the Co<sub>2</sub>P/CPE was separated by centrifugation, washed, and redispersed into the reaction solution containing fresh ErB and TEOA and the resulting system was subjected to light irradiation.

The monochromatic apparent quantum efficiencies (AQEs) of the H<sub>2</sub> evolution were measured under conditions similar to those in the above photocatalytic reaction except that the light source was equipped with various band-pass filters (450, 475, 500, 520 and 550 nm). The photon flux of incident light was determined using a ray virtual radiation actinometer (Apogee MQ-500, a silicon ray detector, light spectrum, 389–692 nm; measurement range, 0-4000 μmol m<sup>-2</sup> s<sup>-1</sup>). The AQE was calculated from the ratio of the number of reacted electrons during H<sub>2</sub> evolution to the number of incident photons according to equation (1) as follows:

$$\text{AQE(\%)} = \frac{2 \times \text{number of evolved H}_2 \text{ molecules}}{\text{number of incident photons}} \times 100\% \quad (1)$$

#### *1.4.2 Semiconductor-based photocatalytic H<sub>2</sub> evolution experiments*

The semiconductor-based composite photocatalyst was prepared by simply mixing 5 mg of Co<sub>2</sub>P/CPE or Co/CPE with 100 mg of CdS. The resulting composited

photocatalysts (CdS-Co<sub>2</sub>P/CPE and CdS-Co/CPE) were added into a reactor containing 100 mL of lactic acid (LA, 10 vol%), degassed by repeatedly vacuuming and filling N<sub>2</sub>, and irradiated by a 300 W Xe lamp equipped with a 420 nm cut-off filter. During the reaction process, the reaction solution was continuously stirred and kept at room temperature by circulating with a flow of cooling water. The amount of H<sub>2</sub> produced was manually taken out by a gas-tight syringe (Agilent, 1.0 mL) and analyzed at given time intervals with a gas chromatography (Tech comp; GC-7900) with a thermal conductivity detector, a 5 Å molecular sieve column, and with N<sub>2</sub> as carrying gas.

### **1.5 Electrochemical and photoelectrochemical measurements**

Photoelectrochemical measurements were carried out with a three-electrode system using an electrochemical workstation (CHI760E, Shanghai, China). The saturated Ag/AgCl electrode and Pt mesh (1 cm×1 cm) were used as reference electrode and counter electrode, respectively. For the fabrication of working electrode, the catalyst ink was prepared by dispersing 5 mg of catalyst into 2.5 mL of ethanol solution containing 25 µL of 5 wt% Nafion solution by ultrasonication for 15 min. Afterwards, 500 µL of as-prepared catalyst ink was loaded onto conductive side of an indium-doped tin oxide (ITO) glass (1 cm×1 cm) and dried at 60 °C overnight. A 0.2 M Na<sub>2</sub>SO<sub>4</sub> solution containing 10 vol.% LA was used as the supporting electrolyte. The transient photocurrent response was recorded at a bias of 0.5 V vs. Ag/AgCl under chopped visible light irradiation. A 300-W Xe lamp equipped with a 420 nm cut-off filter was used as light source. The electrocatalytic H<sub>2</sub> evolution activity was measured using linear sweep voltammetry (LSV) with a scan rate of 5 mV s<sup>-1</sup>.

## 2. Additional data

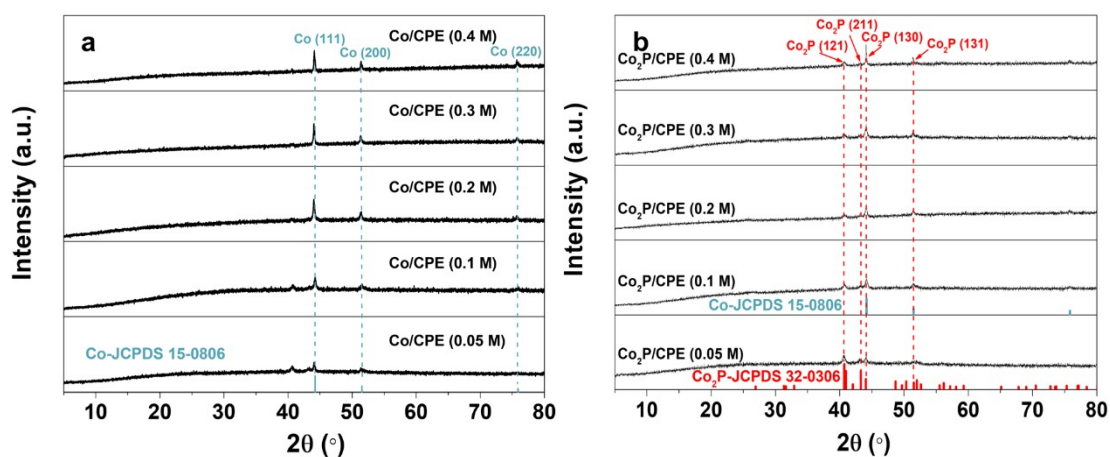

**Fig. S1** XRD patterns of (a) Co/CPE and (b) Co<sub>2</sub>P/CPE samples prepared using different concentrations of Co salt.

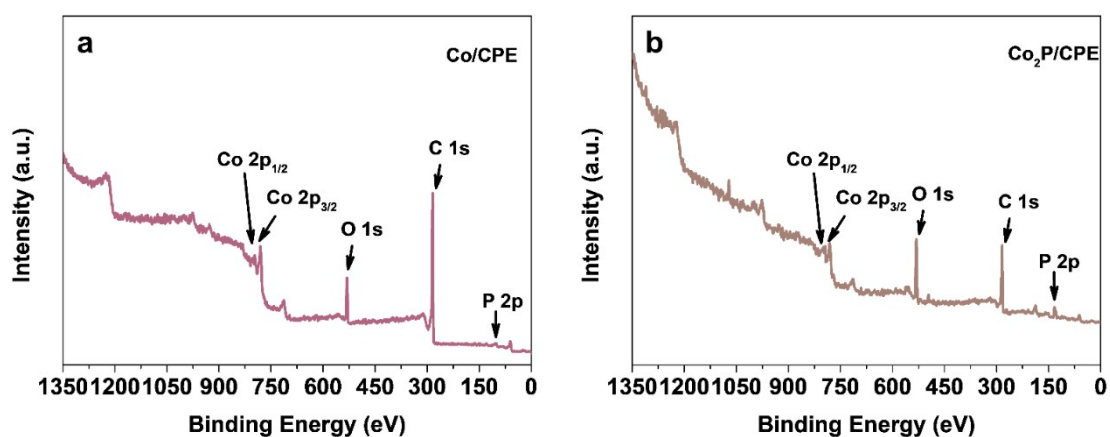

**Fig. S2** XPS survey spectra of (a) Co/CPE and (b) Co<sub>2</sub>P/CPE.

**Table S1** Textual characteristics of Co/CPE and Co<sub>2</sub>P/CPE.

| Sample                | Co<br>(wt.%) <sup>a</sup> | P<br>(wt.%) <sup>a</sup> | Surface<br>area<br>(cm <sup>2</sup> g <sup>-1</sup> ) <sup>b</sup> | pore volume<br>(cm <sup>3</sup> g <sup>-1</sup> ) <sup>c</sup> | Pore size<br>(nm) <sup>d</sup> |
|-----------------------|---------------------------|--------------------------|--------------------------------------------------------------------|----------------------------------------------------------------|--------------------------------|
| Co/CPE                | 42.30                     | 2.54                     | 54.4                                                               | 0.12                                                           | 9.1                            |
| Co <sub>2</sub> P/CPE | 37.95                     | 14.19                    | 42.6                                                               | 0.14                                                           | 13.1                           |

<sup>a</sup> The element content was determined by ICP-OES analysis.

<sup>b</sup> The specific surface area determined by N<sub>2</sub> adsorption-desorption measurements.

<sup>c</sup> Single point-total pore volume of the pores at  $P/P_0=0.99$ .

<sup>d</sup> Adsorption average pore width (4 V A<sup>-1</sup> by BET).

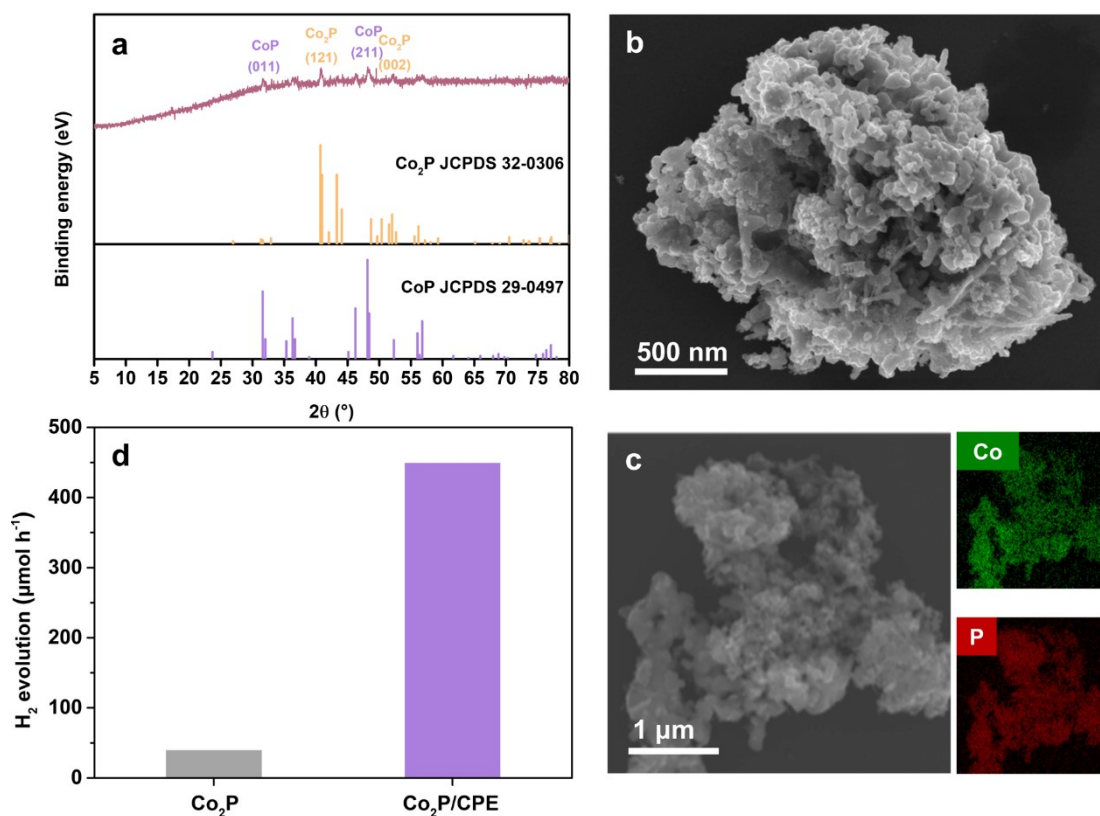

**Fig. S3** (a) XRD patterns of free  $\text{Co}_2\text{P}$  nanoparticles. (b) SEM image and (c) the corresponding SEM-EDX maps of free  $\text{Co}_2\text{P}$  nanoparticles. (d) Photocatalytic  $\text{H}_2$  evolution activities of free  $\text{Co}_2\text{P}$  nanoparticles and  $\text{Co}_2\text{P/CPE}$  in the ErB-TEOA system. Reaction conditions: light source: 30 W white-light LED lamp,  $\lambda \geq 420$  nm; TEOA solution, 10 vol%, 100 mL, pH 8; ErB: 0.5 mM;  $\text{Co}_2\text{P}$ : 19 mg;  $\text{Co}_2\text{P/CPE}$ : 50 mg.

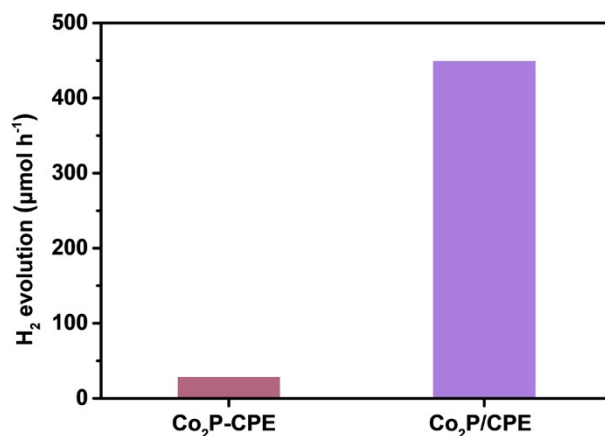

**Fig. S4** Photocatalytic H<sub>2</sub> evolution activities of physically mixed Co<sub>2</sub>P-CPE and Co<sub>2</sub>P/CPE in the ErB-TEOA system. Reaction conditions: light source: 30 W white-light LED lamp,  $\lambda \geq 420$  nm; TEOA solution, 10 vol%, 100 mL, pH 8; ErB: 0.5 mM; cocatalyst: 50 mg.

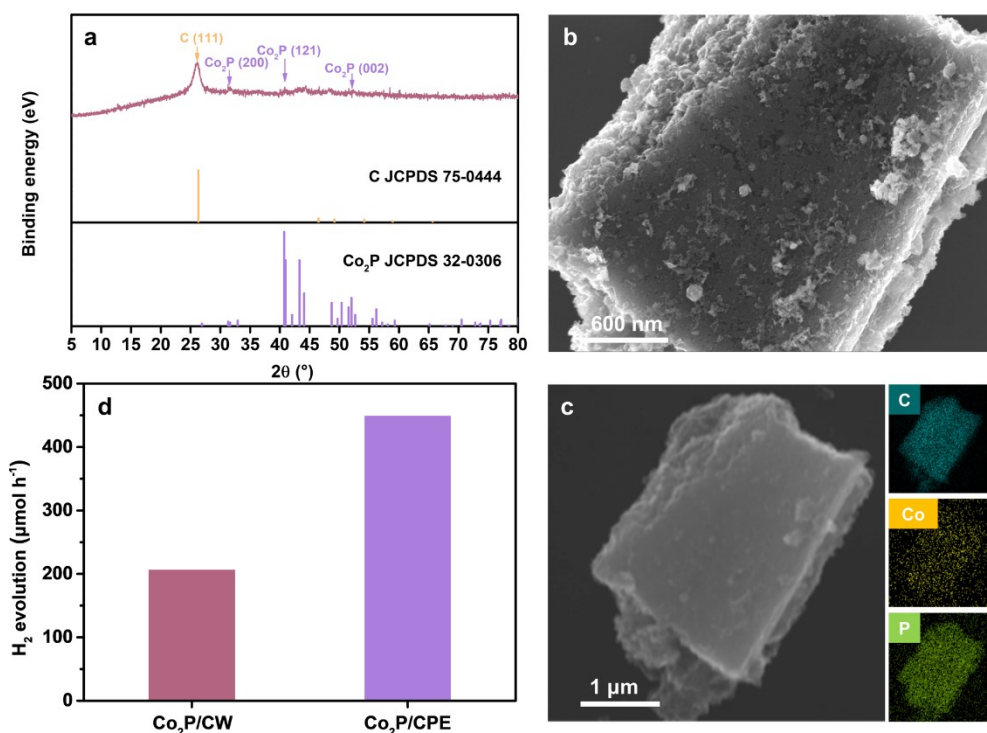

**Fig. S5** (a) XRD patterns of Co<sub>2</sub>P/CW. (b) SEM image and (c) the corresponding SEM-EDX maps of Co<sub>2</sub>P/CW. (d) Photocatalytic H<sub>2</sub> evolution activities of Co<sub>2</sub>P/CW in the ErB-TEOA system. Reaction conditions: light source: 30 W white-light LED lamp,  $\lambda \geq 420$  nm; TEOA solution, 10 vol%, 100 mL, pH 8; ErB: 0.5 mM; cocatalyst: 50 mg.



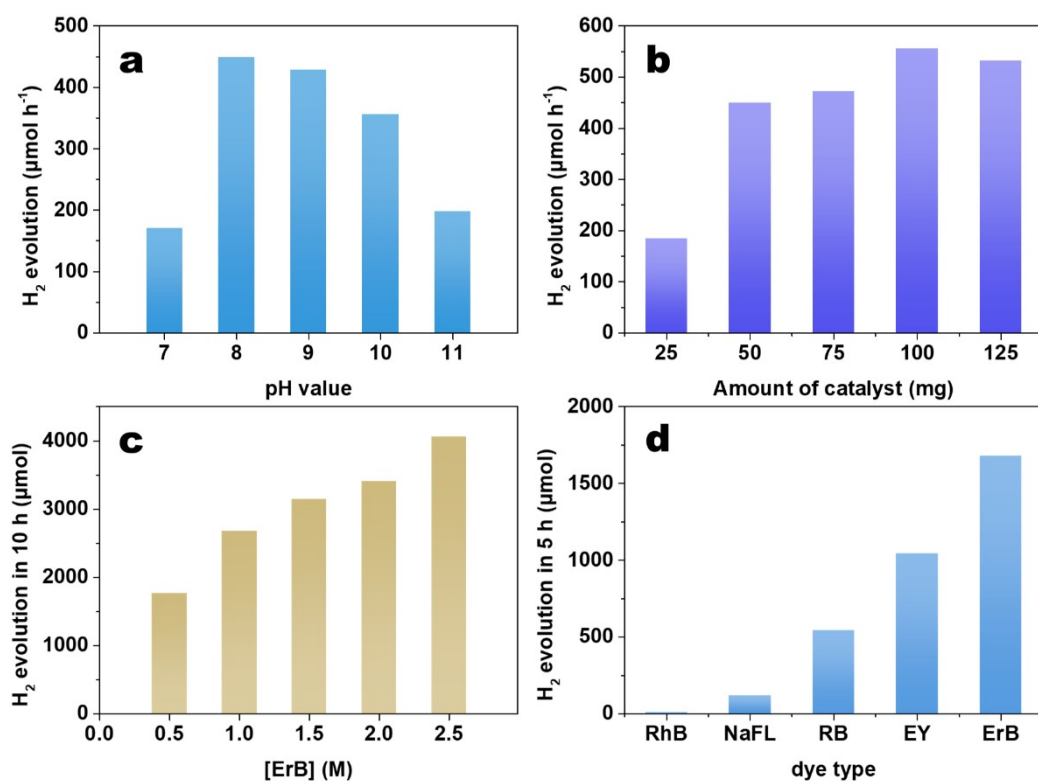

**Fig. S6** Effects of (a) pH value of TEOA solution (ErB: 0.5 mM; Co<sub>2</sub>P/CPE: 50 mg), (b) dosage of Co<sub>2</sub>P/CPE (ErB: 0.5 mM; pH 8), (c) concentration of ErB (Co<sub>2</sub>P/CPE: 50 mg pH 8), and (d) type of dye (dye: 0.5 mM; Co<sub>2</sub>P/CPE: 50 mg; pH 8) on the photocatalytic HER performance of dye-sensitized Co<sub>2</sub>P/CPE system under visible light. Reaction conditions: light source: 30 W white-light LED lamp,  $\lambda \geq 420$  nm; TEOA solution, 10 vol%, 100 mL.

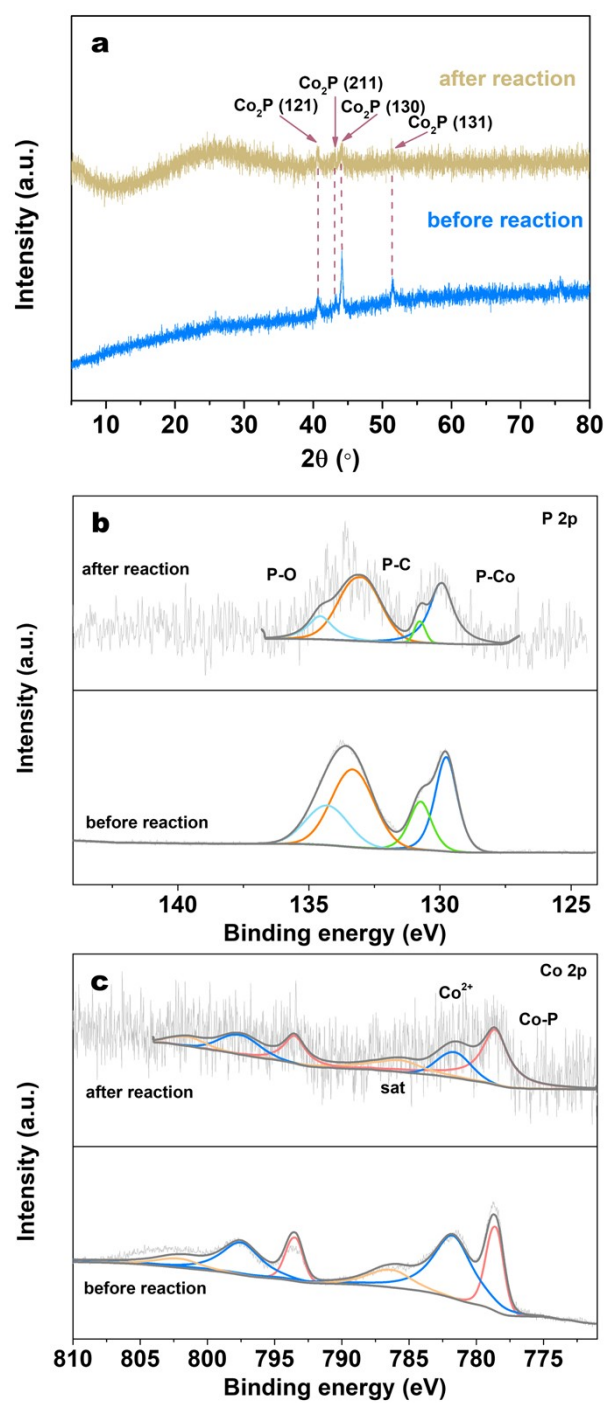

**Fig. S7** (a) XRD spectra, (b) P 2p, and (c) Co 2p XPS spectra of  $\text{Co}_2\text{P}/\text{CPE}$  before and after cycling HER stability test.

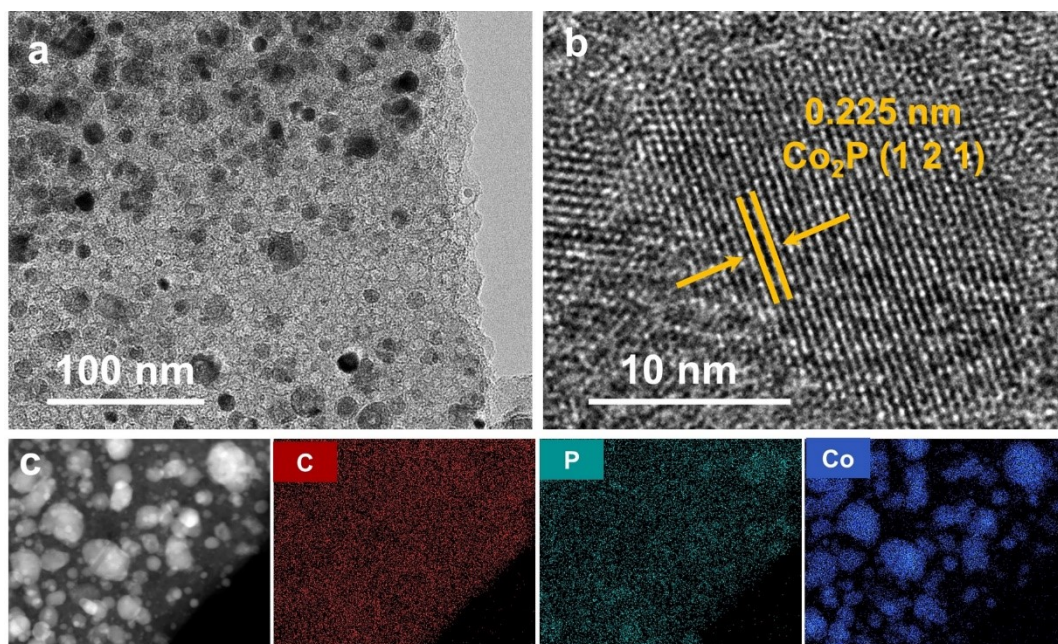

**Fig. S8** (a) TEM and (b) HRTEM, (c) HAADF-STEM and the corresponding EDX images of  $\text{Co}_2\text{P}/\text{CPE}$  after cycling HER stability test.

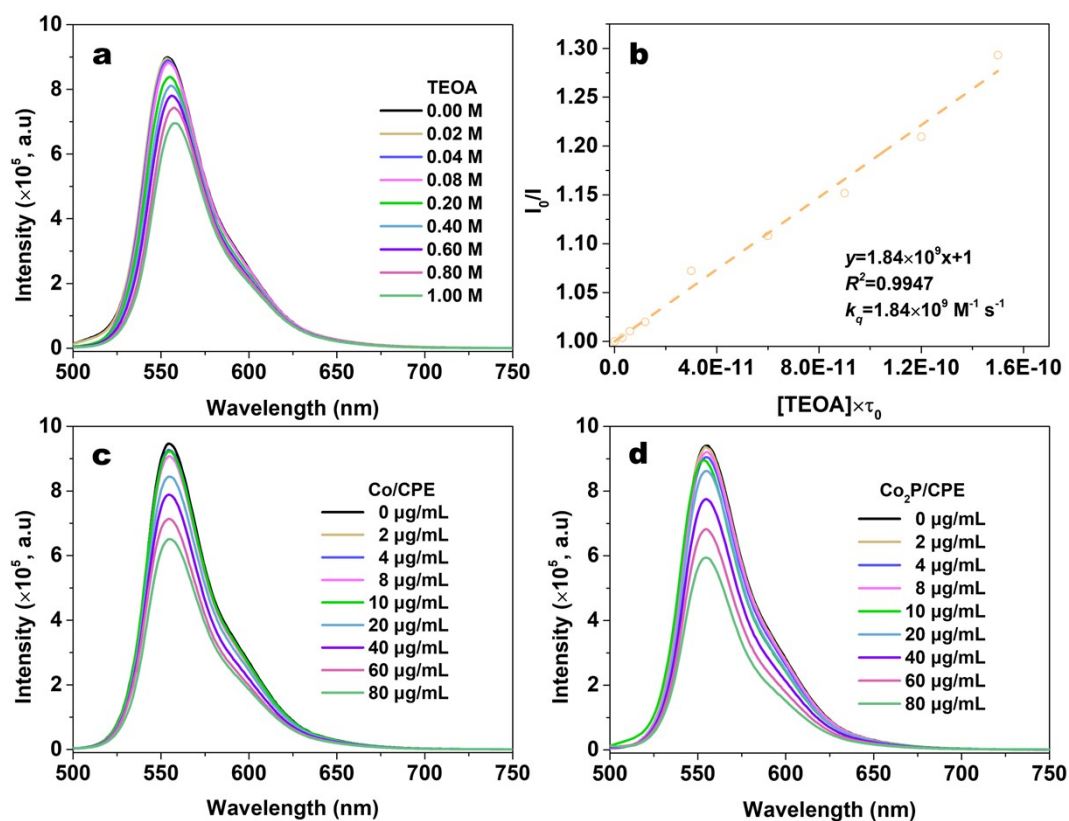

**Fig. S9** PL emission quenching of excited ErB solution (10 mM) in the presence of (a) TEOA, (c) Co/CPE, and (d) Co<sub>2</sub>P/CPE. (b) Stern–Volmer plot for PL emission quenching of excited ErB solution (10 mM) with TEOA ( $\tau_{\text{ErB}}=0.15$  ns).

**Table S2:** A comparison of the HER activity of CdS-Co<sub>2</sub>P/CPE with previously reported metal phosphide cocatalyst–semiconductor composites for photocatalytic hydrogen evolution.

| Entry | Catalysts                                                           | H <sub>2</sub> evolution rate (μmol·g <sup>-1</sup> h <sup>-1</sup> ) | Light sources              | Sacrificial agents                                | Ref.             |
|-------|---------------------------------------------------------------------|-----------------------------------------------------------------------|----------------------------|---------------------------------------------------|------------------|
| 1     | Ni <sub>x</sub> P:CZS/NT0                                           | 27575                                                                 | 300-W Xe lamp (λ ≥ 420 nm) | Na <sub>2</sub> S/Na <sub>2</sub> SO <sub>3</sub> | 1                |
| 2     | CdS/CoP@AAH                                                         | 54900                                                                 | 300-W Xe lamp (λ > 400 nm) | Lactic acid                                       | 2                |
| 3     | ZnCoP/CdLa <sub>2</sub> S <sub>4</sub>                              | 10260                                                                 | 300-W Xe lamp (λ ≥ 400 nm) | Na <sub>2</sub> S/Na <sub>2</sub> SO <sub>3</sub> | 3                |
| 4     | PMCSFP                                                              | 2937.11                                                               | 300-W Xe lamp (λ ≥ 420 nm) | Lactic acid                                       | 4                |
| 5     | Fe <sub>2</sub> P–Co <sub>2</sub> P/g-C <sub>3</sub> N <sub>4</sub> | 347                                                                   | 300-W Xe lamp (λ = 420 nm) | TEOA                                              | 5                |
| 6     | CdS–Co <sub>2</sub> P/CPE                                           | 6098.1                                                                | 300-W Xe lamp (λ ≥ 420 nm) | Lactic acid                                       | <b>This work</b> |

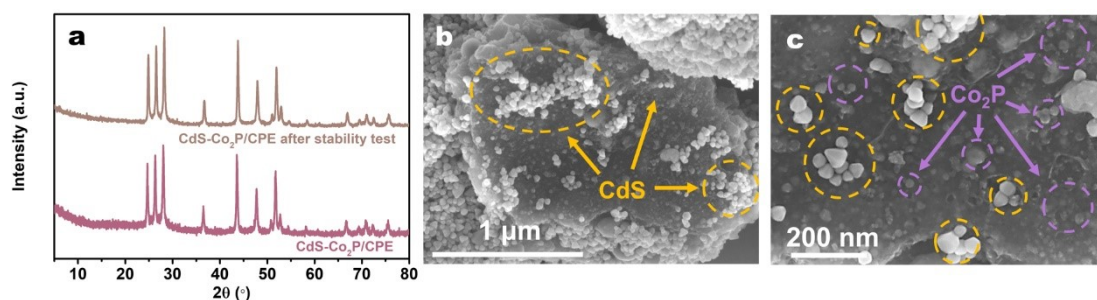

**Fig. S10** (a) XRD patterns of CdS-Co<sub>2</sub>P/CPE before and after stability test. (b) Low- and (c) high-magnification SEM images of CdS-Co<sub>2</sub>P/CPE after stability test.

### Supplementary references

1. B. F. Li, W. Y. Guo, X. F. Lu, Y. D. Hou, Z. X. Ding, S. B. Wang, *Mater. Rep: Energy*, 2023, **3**, 100230.
2. J. N. Tao, M. Y. Wang, X. Z. Zhang, L. Lu, H. Tang, Q. Q. Liu, S. Y. Lei, G. J. Qiao, G. W. Liu, *Appl. Catal., B*, 2023, **320**, 122004.
3. J. Y. He, L. Y. Chen, X. L. Xie, Z. Z. Qin, H. B. Ji, T. M. Su, *Acta Phys.-Chim. Sin*, 2024, **40**, 2404030.
4. Y. Liu, J. W. Yan, D. M. Liu and L. Shi, *J. Alloy. Compd.*, 2023, **938**, 168545.
5. L. H. Cheng, S. M. Xie, Y. J. Zou, D. D. Ma, D. K. Sun, Z. H. Li, Z. Y. Wang and J. W. Shi, *Int. J. Hydrogen Energy*, 2019, **44**, 4133-4142.
